# Supplementary material for: A dense tolerance to water stress: Coordination between water relations strategy and carbon investment in leaf and stem across six fruit tree species
Source: Research Square preprint supplement (doi:10.21203/rs.3.rs-3454094/v1), 2023-10-19
Supplement: Supplementary file 1 [file 3b2a9e2eae73462cd61f63c9.docx]

Supplementary Information


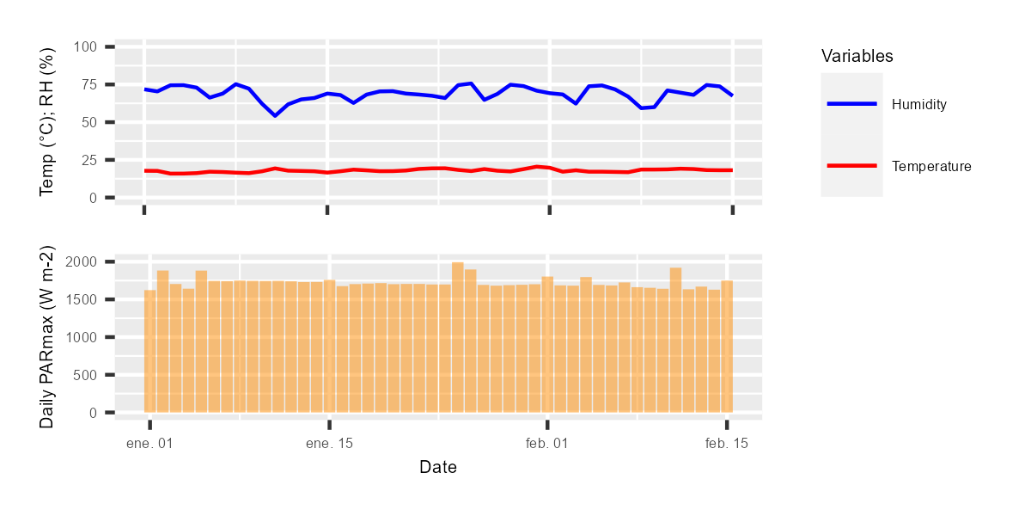


Supplementary Figure 1: Relative humidity, mean air temperature, and incident photosynthetic active radiation during the experimental period. Centro de Estudios de Zonas Áridas, Las Cardas, Coquimbo, North of Chile (Lat -30.251, Lon -71.257, 282 msnm).


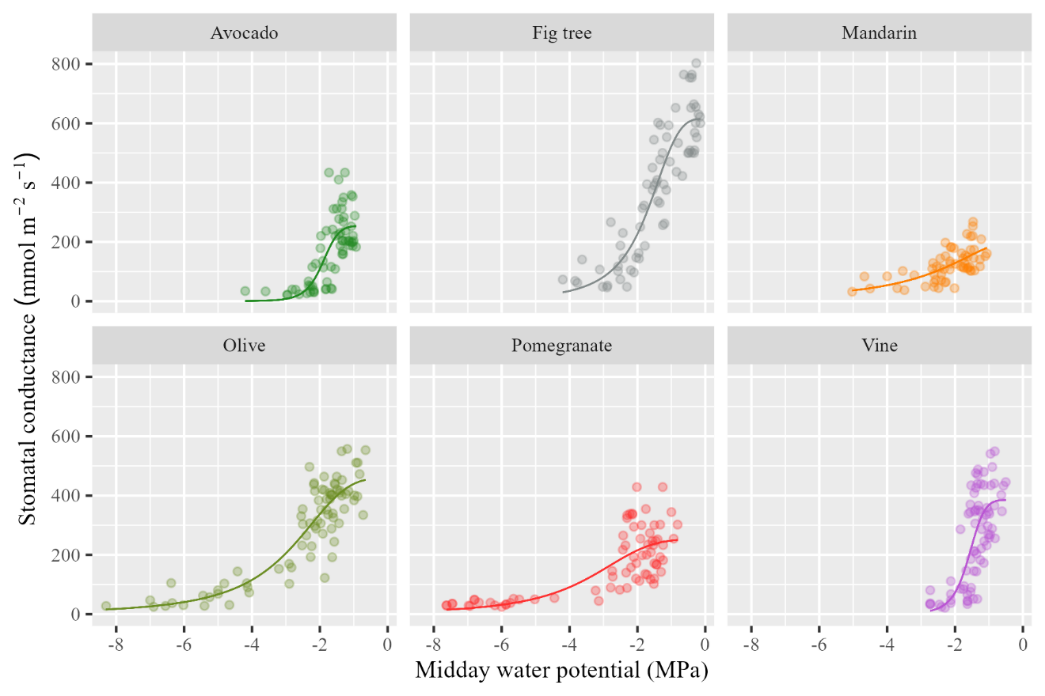


Supplementary Figure 2: Stomatal conductance (gs) as a function of the leaf or twig midday water potential (Ψmd) in six fruit tree species under well-watered (WW) and water deficit (WD) treatments. The curve in each panel is the function for each species.
